# Supplementary material
Source: MDPI journal article supplement (https://www.mdpi.com/2312-7481/7/2/30)
Supplement: s1 [file s1]

## Supplementary Materials

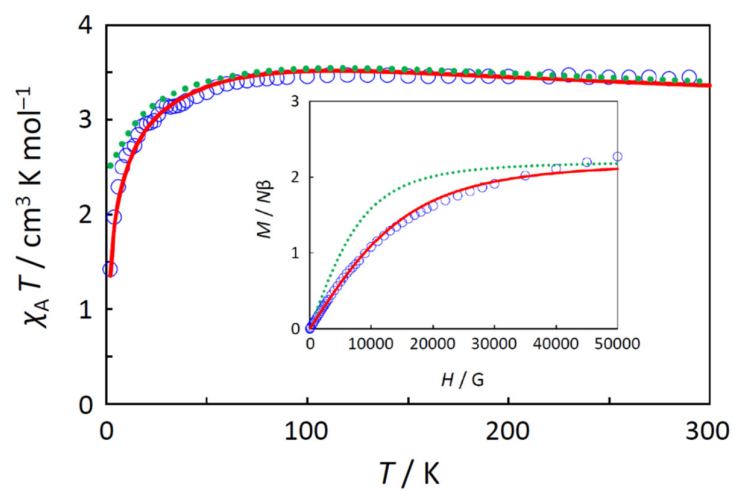

**Figure S1.** The  $\chi T$  versus  $T$  plot and the  $M$  versus  $H$  plot (insertion). The observed data ( $\circ$ ) and the theoretical curves ( $-$ ) with considering  $\theta$  and ( $\cdots$ ) without considering  $\theta$ .
